# Supplementary material for: Prognostic Role of MicroRNA 222 in Patients with Glioma: A Meta-analysis
Source: Biomed Res Int. 2020 Sep 25;2020:4689689. doi: 10.1155/2020/4689689 (PMC7533000; doi:10.1155/2020/4689689)
Supplement: Supplementary Materials — Figure 1: PRISMA 2009 flowchart. Table: PRISMA checklist. [file 4689689.f1.zip]

Archive with 2 entries (2 files):
- PRISMA checklist.doc
- PRISMA Flow Diagram.doc
